# Supplementary material for: Thermal-effect dominated plasmonic catalysis on silver nanoislands
Source: Royal Society of Chemistry journal article supplement (doi:10.1039/d4nr00049h), 2024-01-01
Supplement: d4nr00049h1.pdf [file d4nr00049h1.pdf]

## Thermal-effect dominated plasmonic catalysis on silver nanoislands

Ting Kong,<sup>a, b</sup> Bowen Kang,<sup>b</sup> Wei Wang,<sup>c</sup> Tanja Deckert-Gaudig,<sup>c</sup> Zhenglong Zhang,<sup>\*b</sup>

Volker Deckert,<sup>\*c, d</sup>

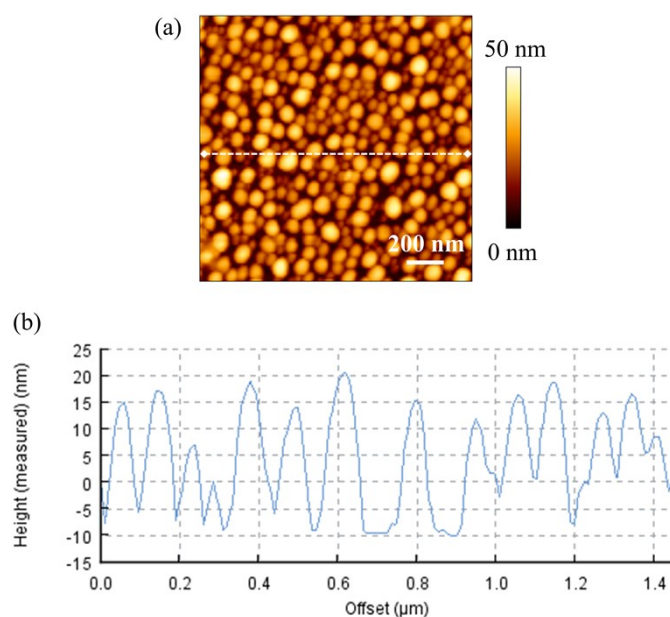

Fig. S1 (a) AFM topography image and (b) the measured height image of Ag NPs extracted from the white dashed line of the AFM image.

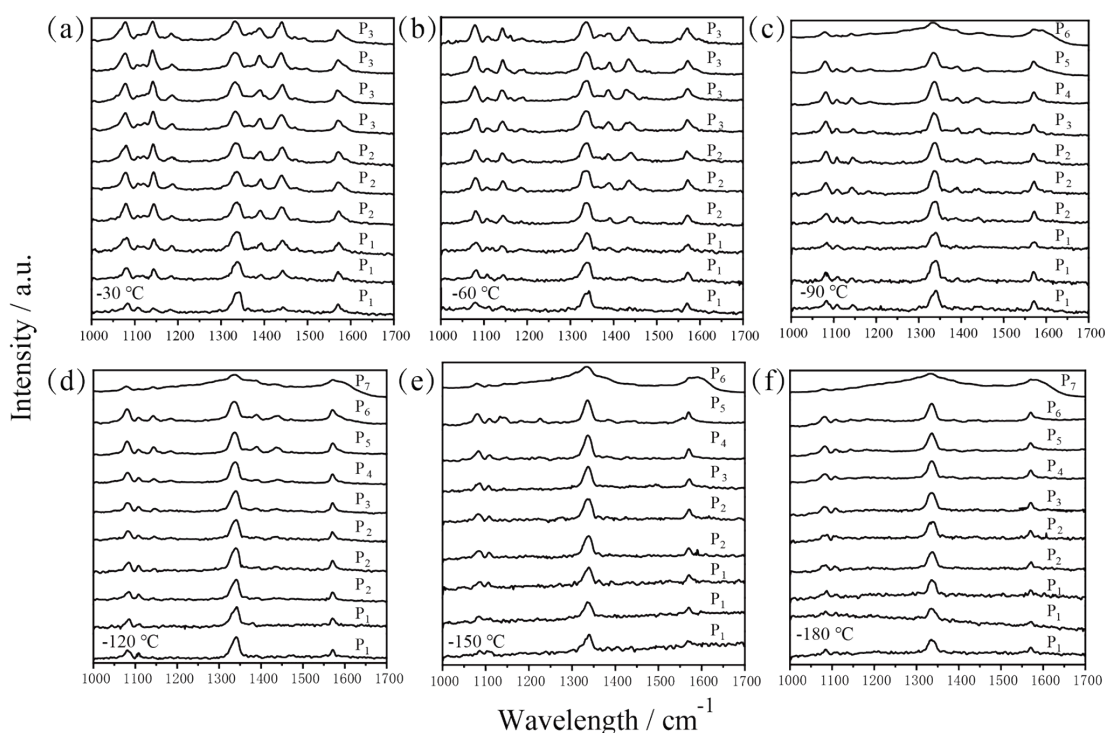

Fig. S2 (a-f) Time-dependent in situ SERS spectra of plasmon-induced photocatalytic reaction at low temperature (-30~-180 °C) under a 633 nm laser at different excitation light intensities. The time interval is 1 min when the spectra acquired from bottom to top and the corresponding laser power are  $P_1$ : 15  $\mu$ W;  $P_2$ : 30  $\mu$ W;  $P_3$ : 60  $\mu$ W;  $P_4$ : 0.1 mW;  $P_5$ : 0.3 mW;  $P_6$ : 0.5 mW;  $P_7$ : 1.0 mW, respectively.

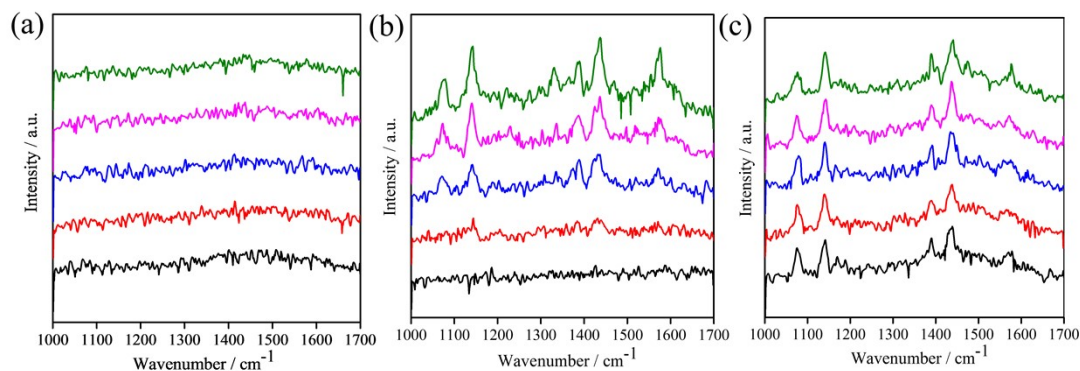

Fig. S3 (a-c) Time-dependent SERS spectra of plasmon-induced photocatalytic reaction of 4-ATP under a 633 nm laser (11.48  $\mu$ W) at room temperature and high temperature of 50 °C and 100 °C, respectively.

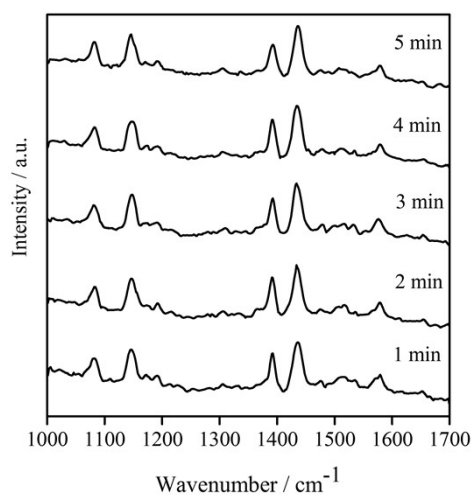

Fig. S4 Time-dependent SERS spectra of plasmon-induced photocatalytic reaction of 4-ATP under a 633 nm laser ( $11.48 \mu\text{W}$ ) at the temperature of  $-180 \text{ }^\circ\text{C}$ .
